# Supplementary material for: Radiators Adjustment in Multi-Family Residential Buildings—An Analysis Based on Data from Heat Meters
Source: MDPI journal article supplement (doi:10.3390/en16227485), 2023-11-08

**CA.var\_1.25+ti.con, RMSE=0.37**

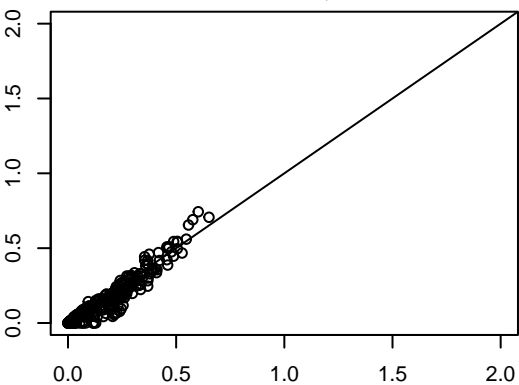

**CA.var+ti.con\_high, RMSE=0.19**

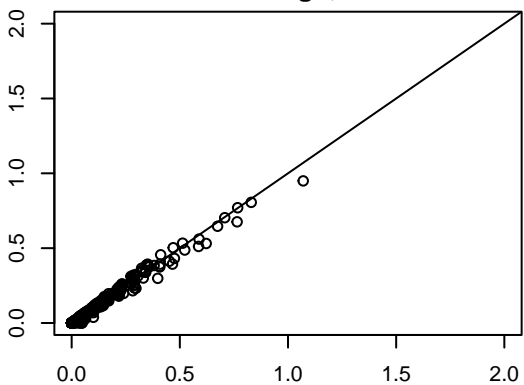

**CA.var+ti.var\_low, RMSE=0.45**

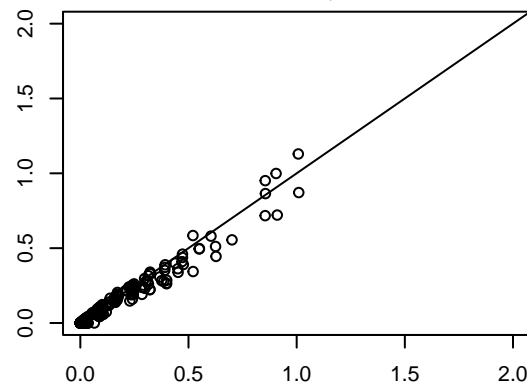

**CA.var+ti.var\_high, RMSE=1.79**

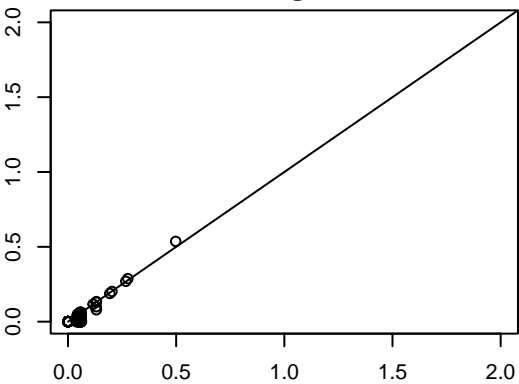

**CA.var\_1.25+ti.var\_low, RMSE=1.19**

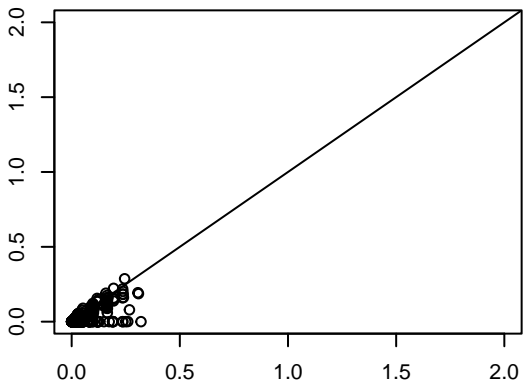

**CA.var\_1.25+ti.con\_low, RMSE=0.44**

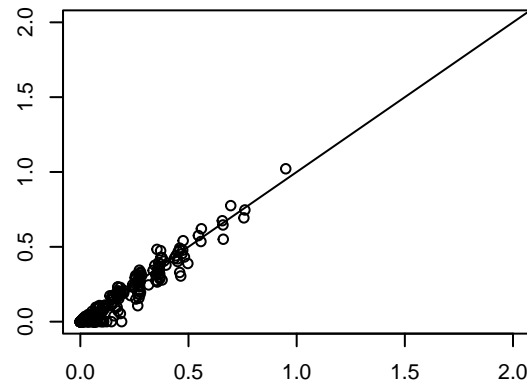

**CA.con\_.75+ti.var\_low, RMSE=0.57**

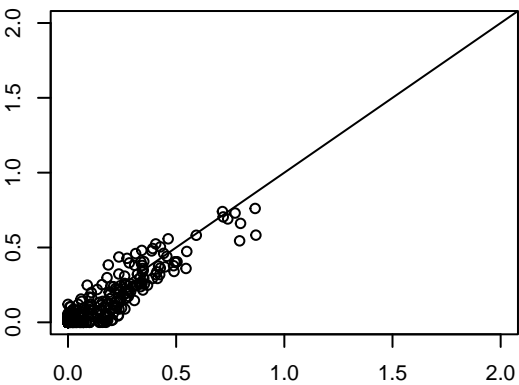

**CA.var+ti.con\_low, RMSE=0.34**

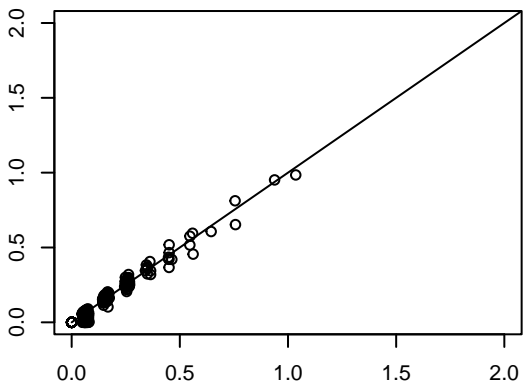

**CA.var\_1.25+ti.var\_low, RMSE=0.33**

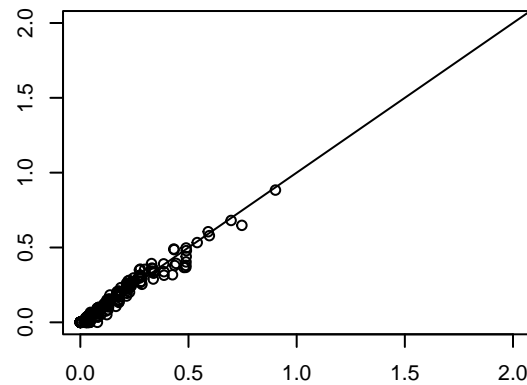

**CA.var+ti.con, RMSE=0.22**

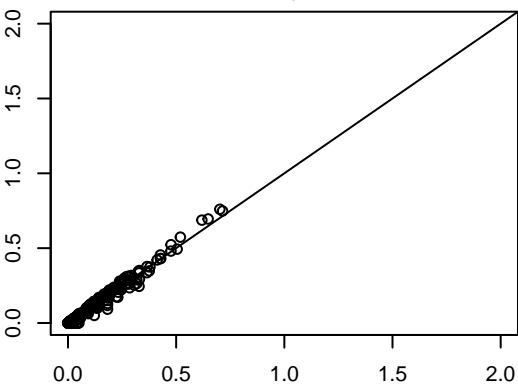

**CA.var+ti.var\_low, RMSE=0.4**

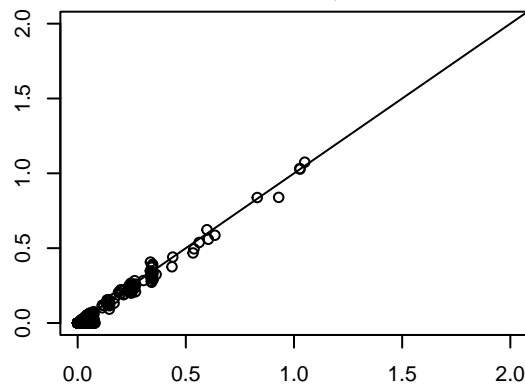

**CA.var+ti.var\_high, RMSE=0.29**

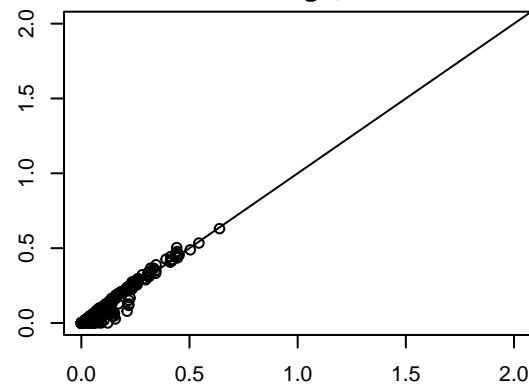

**CA.var+ti.var\_low, RMSE=0.16**

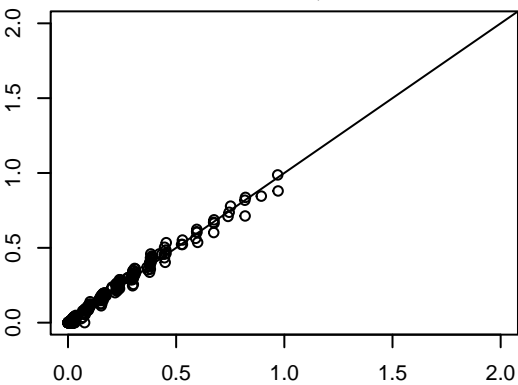

**CA.var+ti.var\_high, RMSE=0.19**

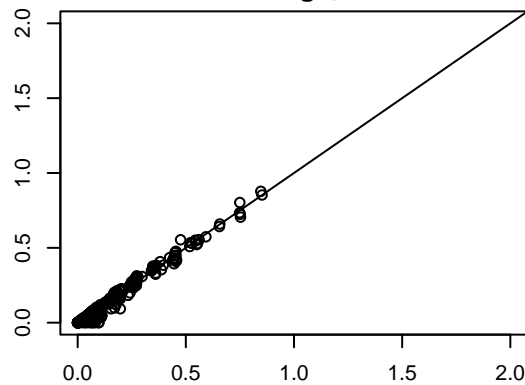

**CA.var+ti.var\_high, RMSE=0.94**

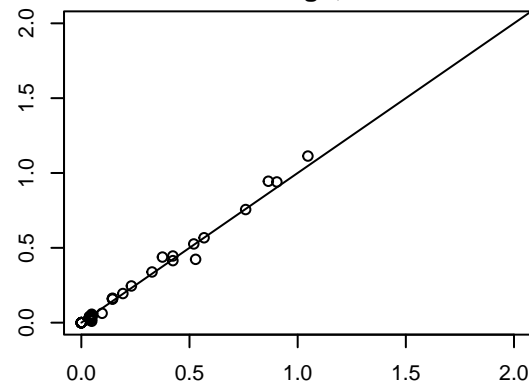

**CA.var+ti.con, RMSE=0.17**

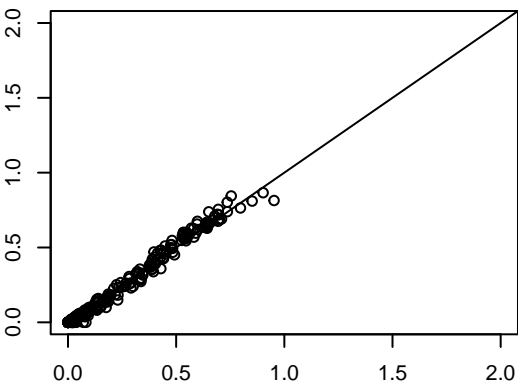

**CA.var\_1.25+ti.con, RMSE=0.37**

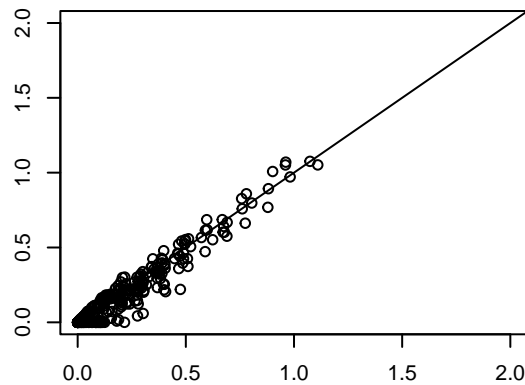

**CA.var+ti.var\_high, RMSE=0.38**

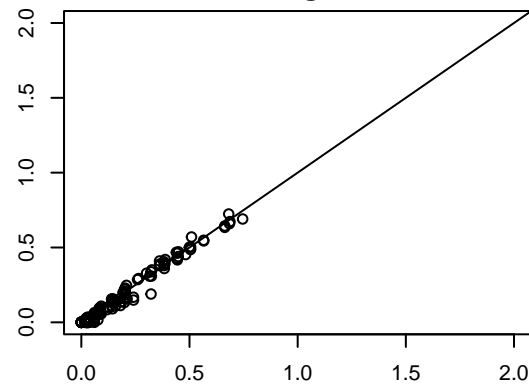

**CA.var+ti.con\_high, RMSE=0.2**

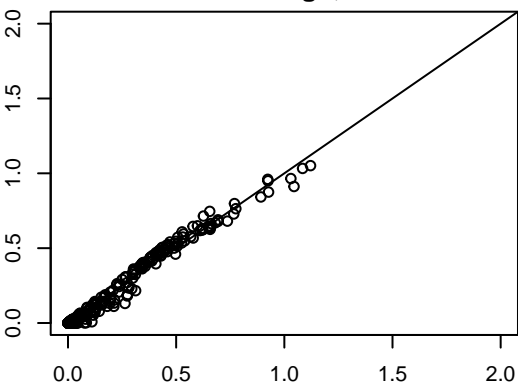

**CA.var\_1.25+ti.var\_low, RMSE=0.53**

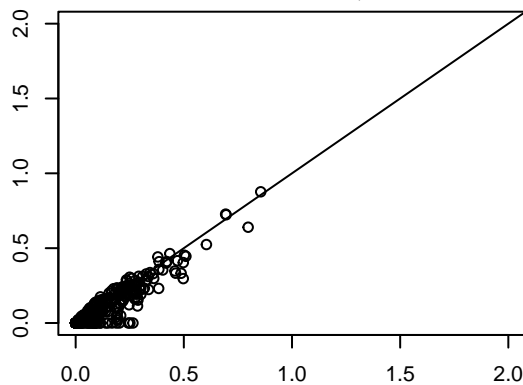

**CA.var+ti.con\_low, RMSE=0.56**

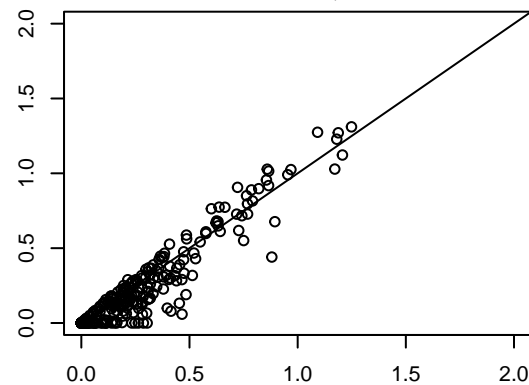

**CA.var\_1.5+ti.con\_low, RMSE=0.52**

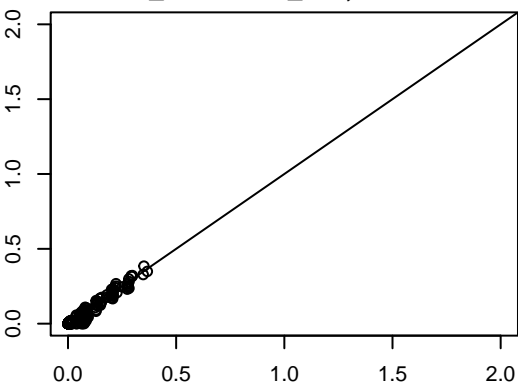

**CA.var+ti.con, RMSE=0.26**

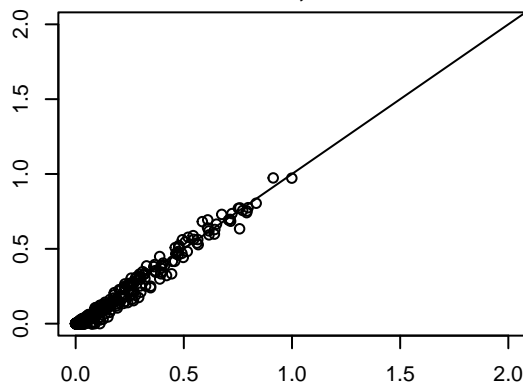

**CA.var+ti.var\_high, RMSE=0.16**

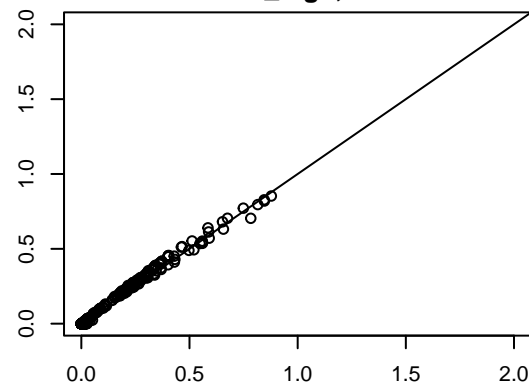

**CA.var\_.75+ti.var\_low, RMSE=0.19**

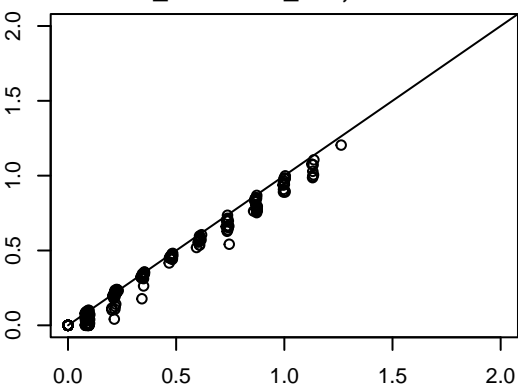

**CA.var+ti.con\_high, RMSE=0.21**

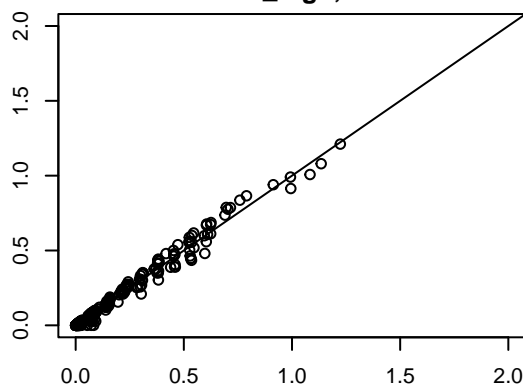

**CA.var+ti.var\_low, RMSE=0.24**

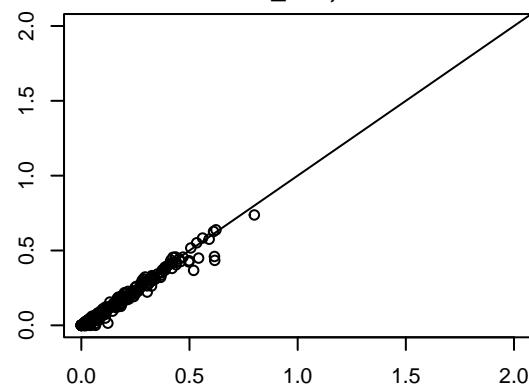

**CA.var+ti.var\_low, RMSE=0.26**

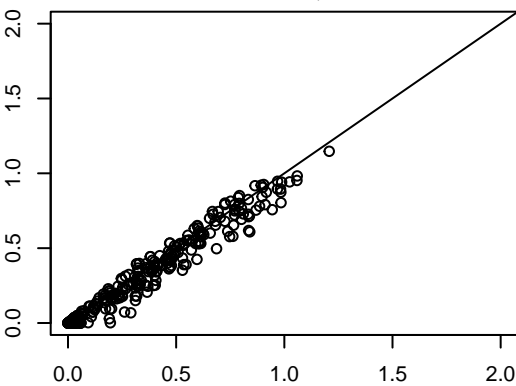

**CA.var+ti.con, RMSE=0.25**

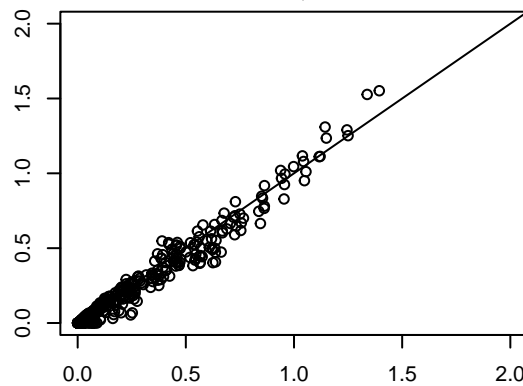

**CA.var+ti.var\_low, RMSE=0.21**

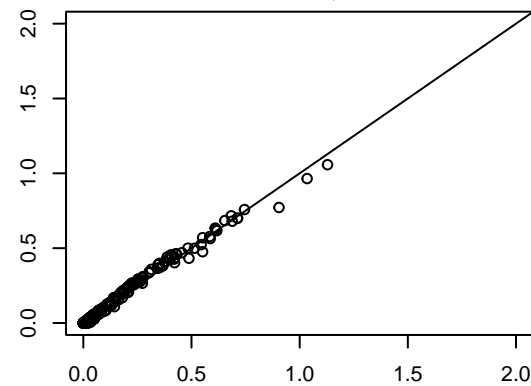

**CA.var+ti.var\_low, RMSE=2.21**

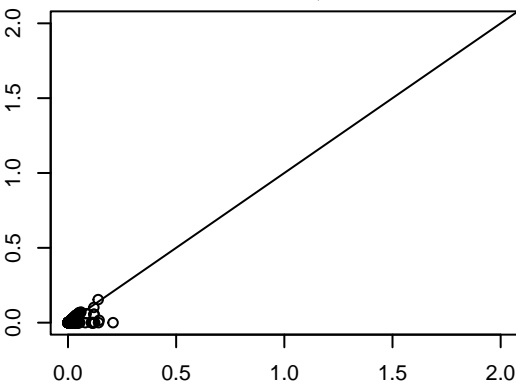

**CA.var\_1.25+ti.var\_high, RMSE=0.33**

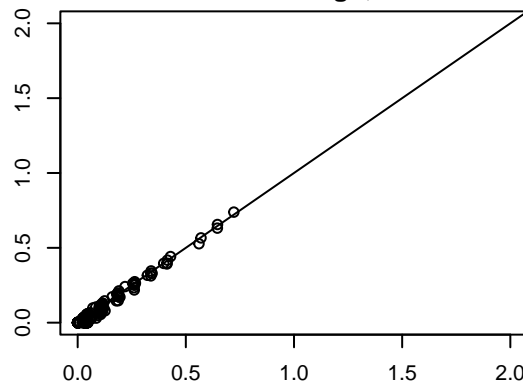

**CA.var+ti.con\_high, RMSE=0.17**

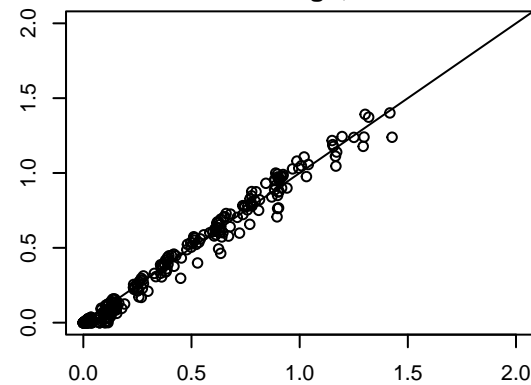

**CA.var+ti.con, RMSE=0.21**

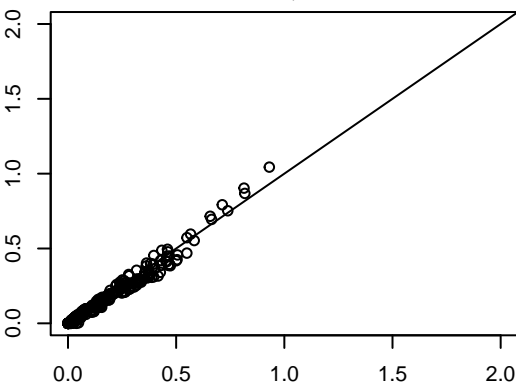

**CA.var+ti.con, RMSE=0.1**

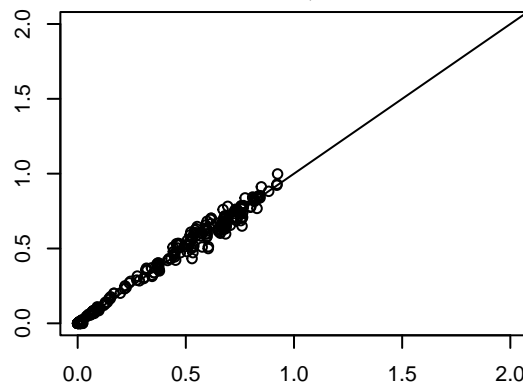

**CA.var+ti.con\_low, RMSE=0.21**

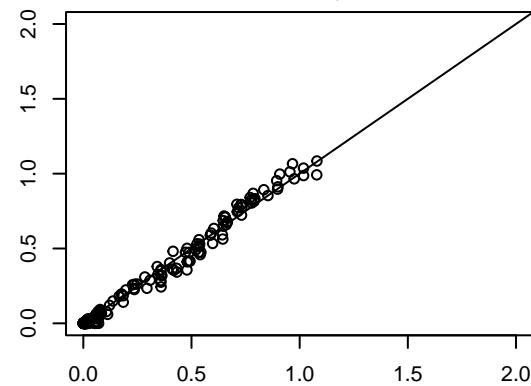

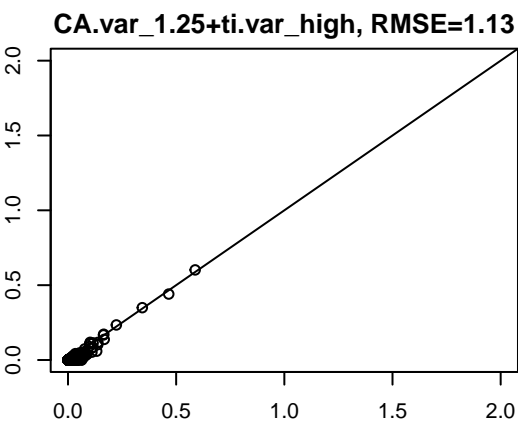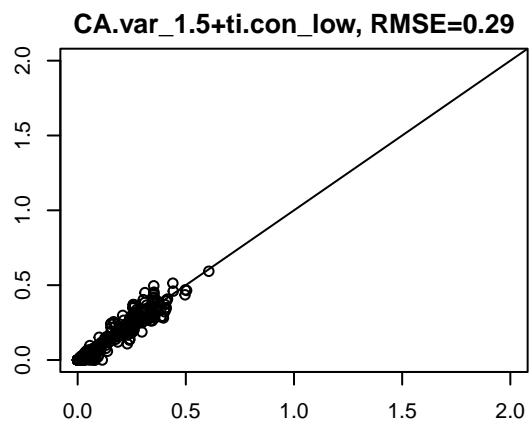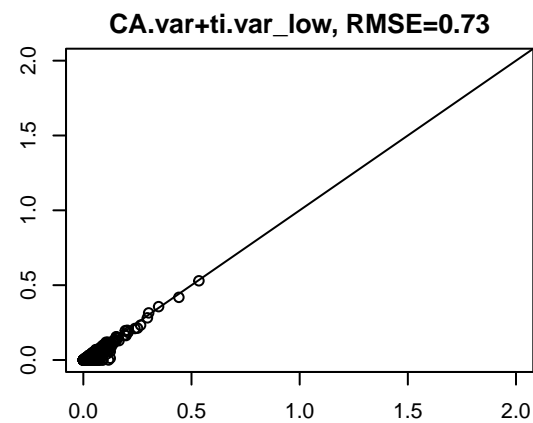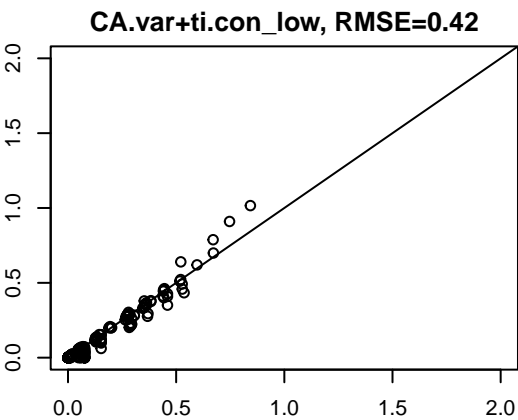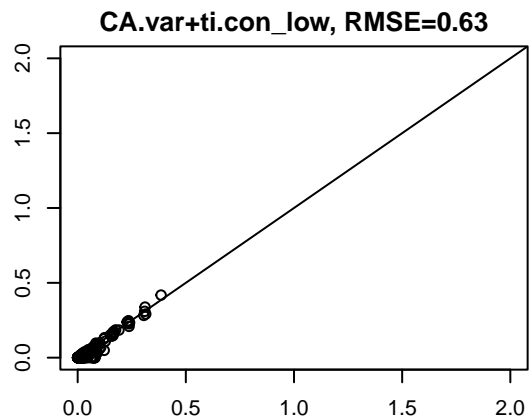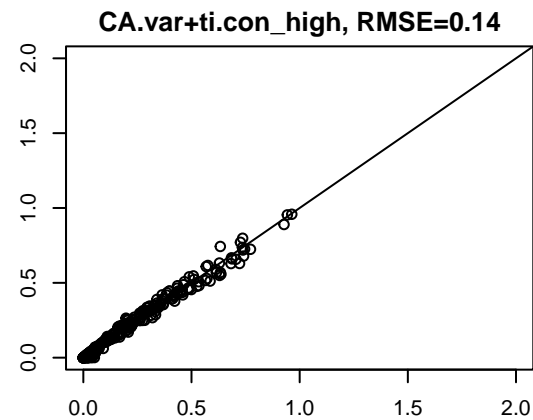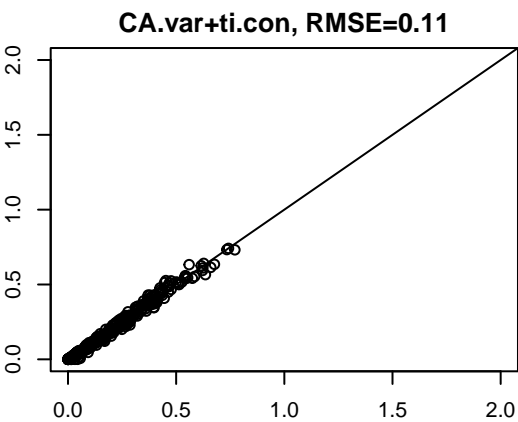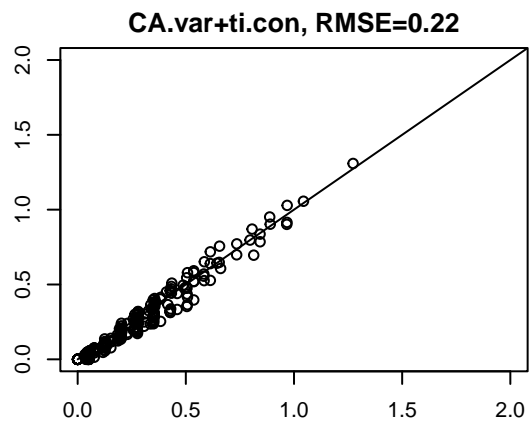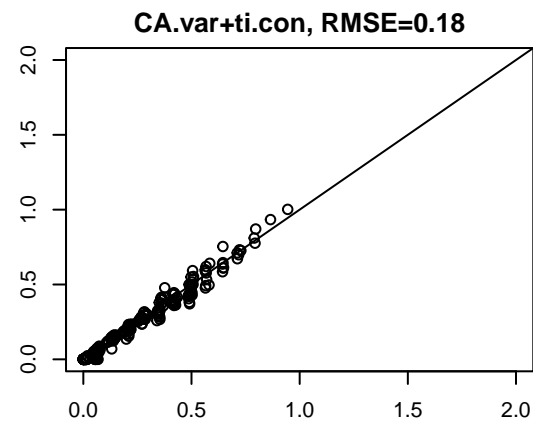

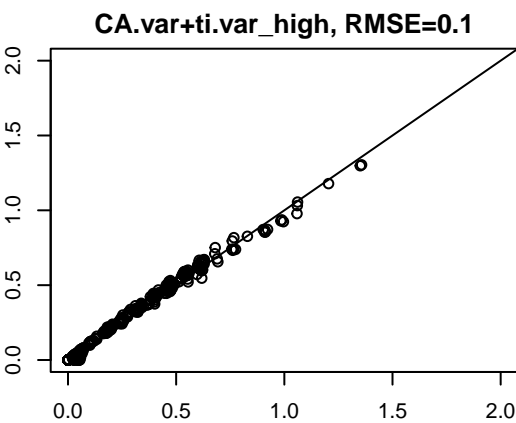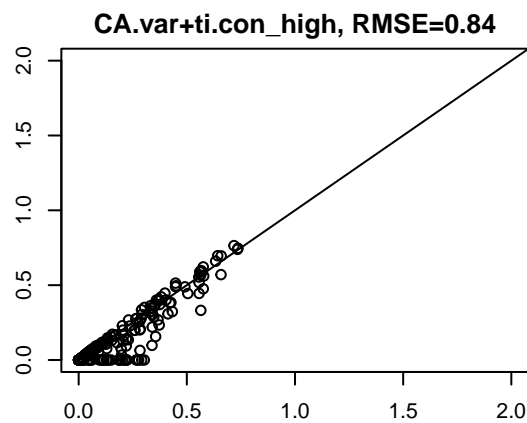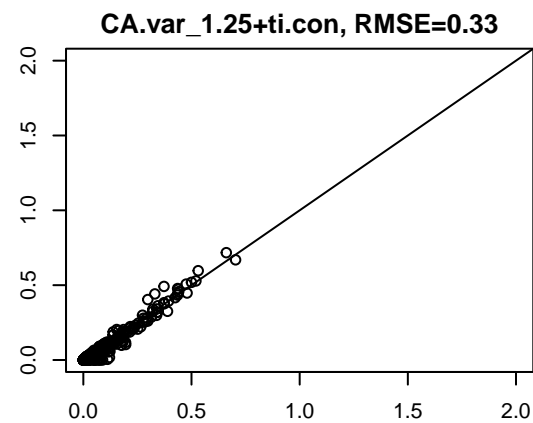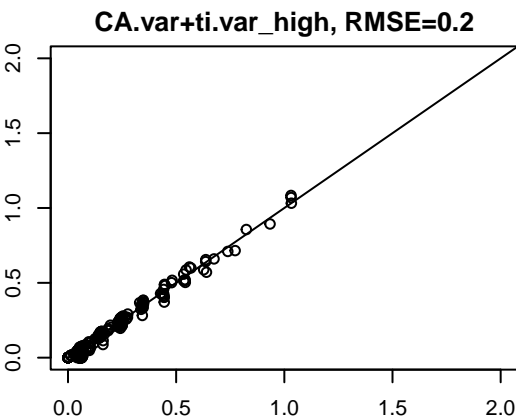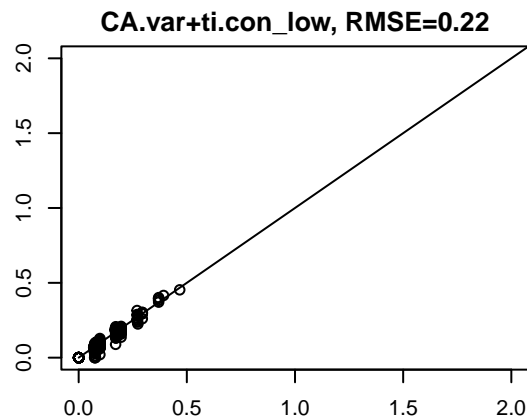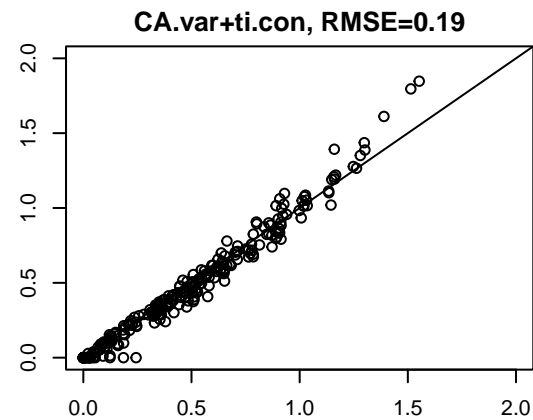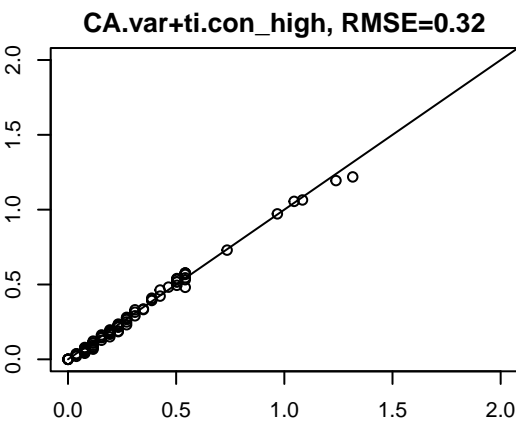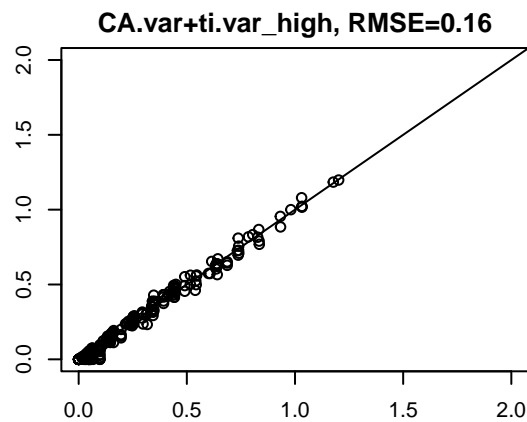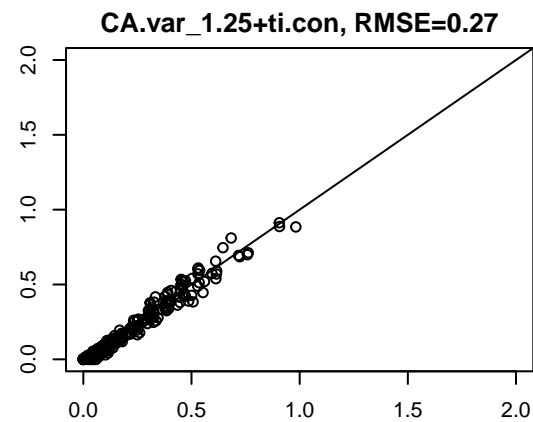

**CA.var+ti.var\_high, RMSE=0.13**

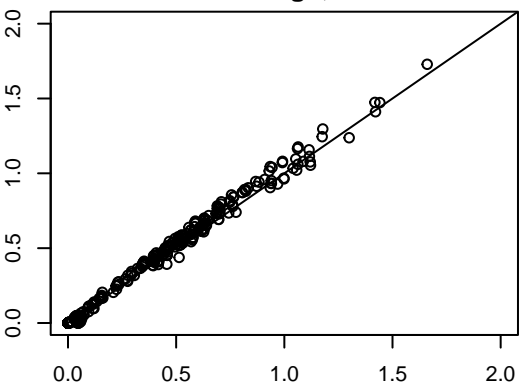

**CA.con\_.5+ti.con\_high, RMSE=1.24**

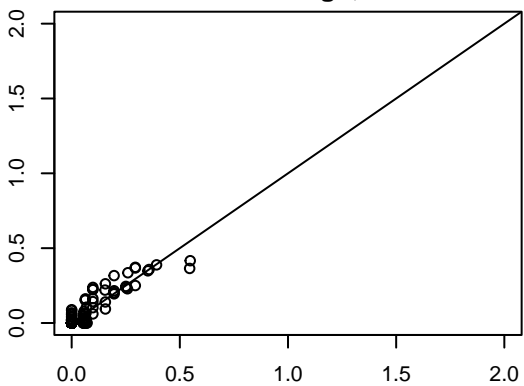

**CA.var+ti.con\_low, RMSE=0.17**

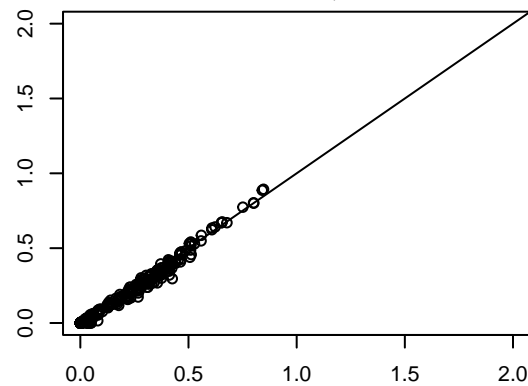

**CA.var+ti.con\_low, RMSE=0.35**

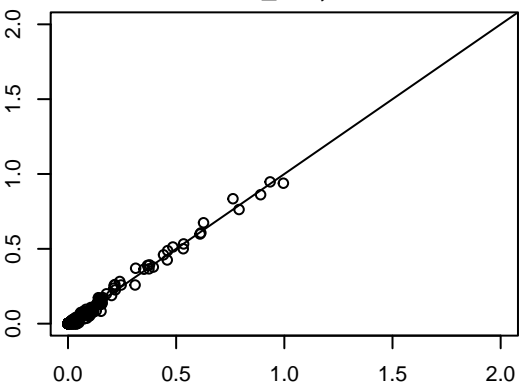

**CA.var+ti.con\_low, RMSE=0.27**

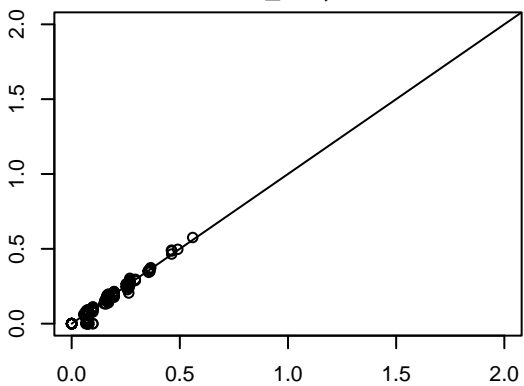

**CA.var+ti.con\_high, RMSE=0.13**

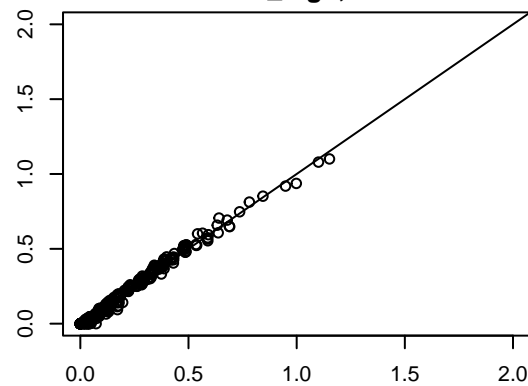

**CA.var+ti.con\_high, RMSE=0.16**

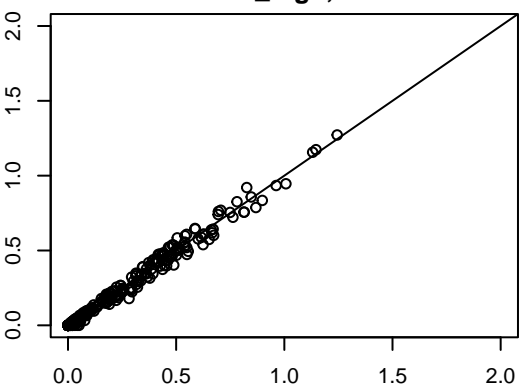

**CA.var+ti.con\_low, RMSE=1.6**

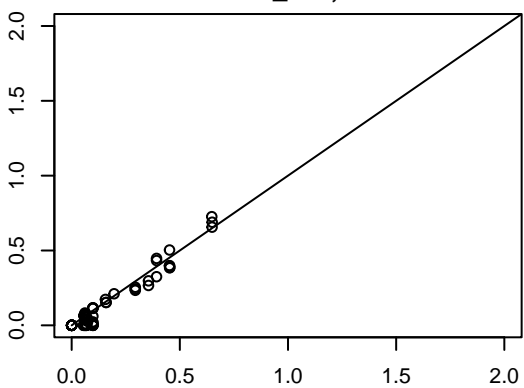

**CA.var+ti.con\_high, RMSE=0.25**

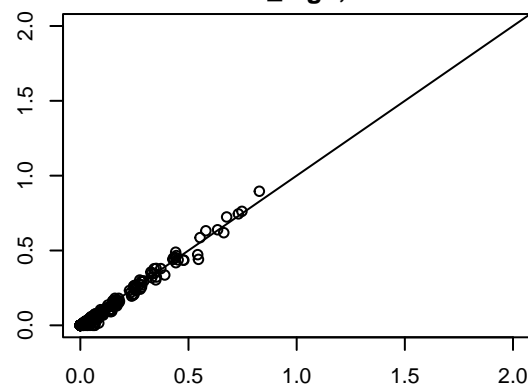

**CA.var+ti.con, RMSE=0.33**

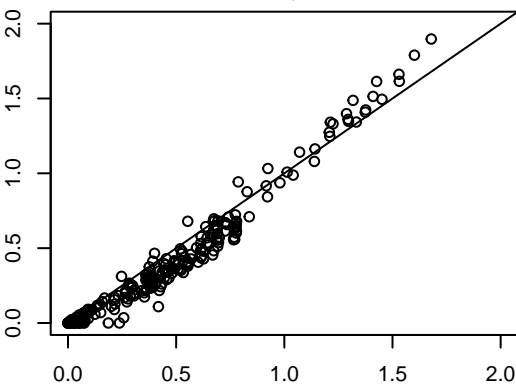

**CA.var+ti.con\_high, RMSE=0.38**

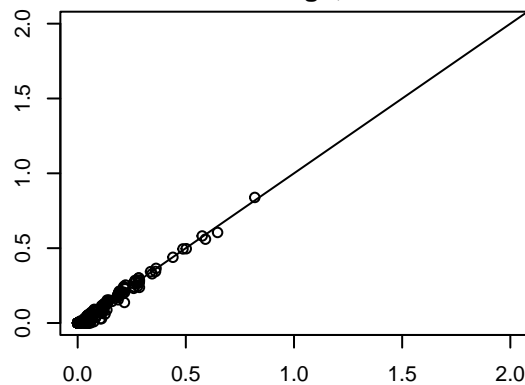

**CA.var+ti.con\_high, RMSE=0.11**

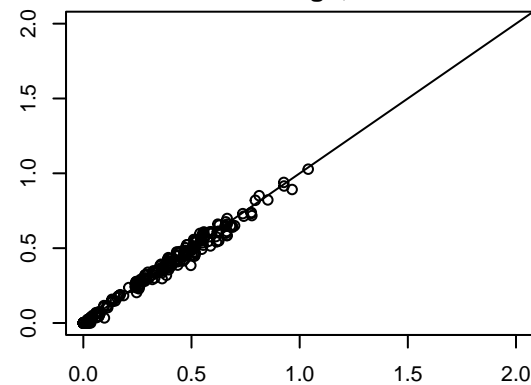

**CA.var+ti.con, RMSE=0.35**

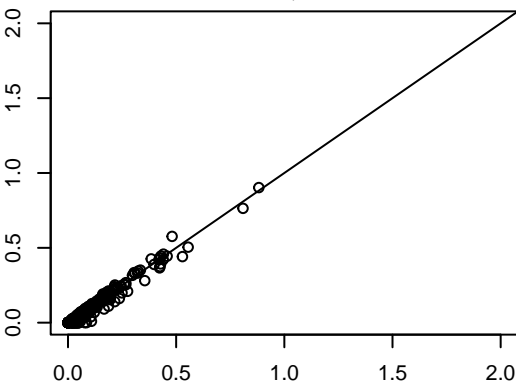

**CA.var\_1.25+ti.var\_low, RMSE=0.21**

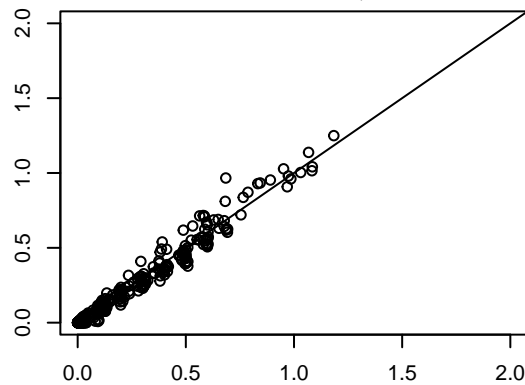

**CA.var\_1.25+ti.var\_low, RMSE=0.37**

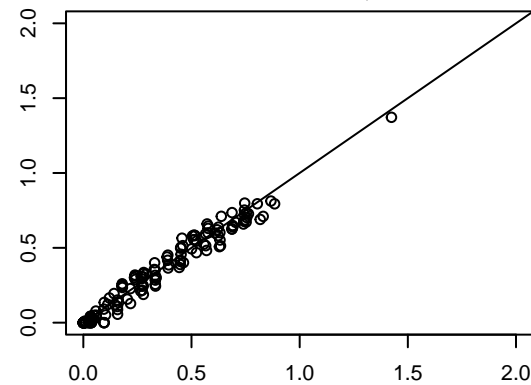

**CA.con\_1.5+ti.con\_high, RMSE=0.58**

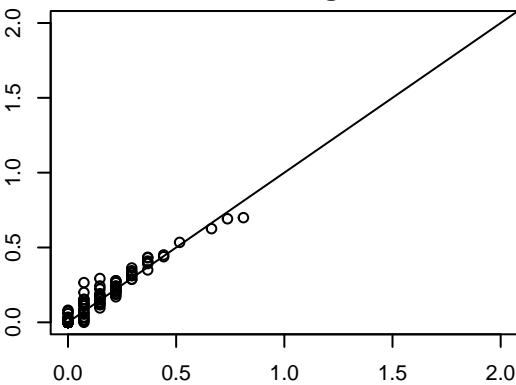

**CA.var+ti.con\_low, RMSE=0.22**

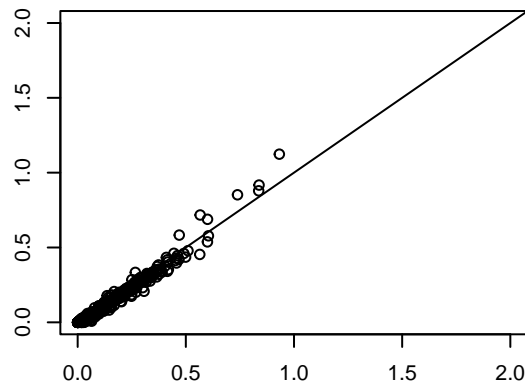

**CA.var\_1.25+ti.con\_high, RMSE=0.21**

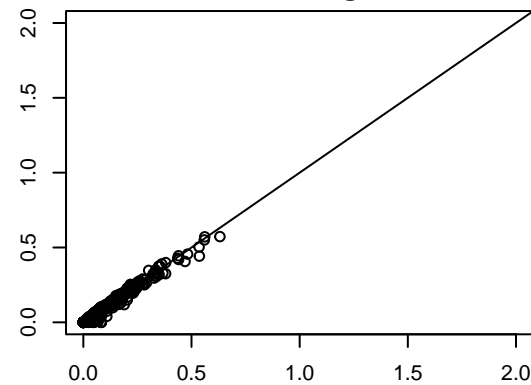



**CA.var+ti.con, RMSE=0.24**

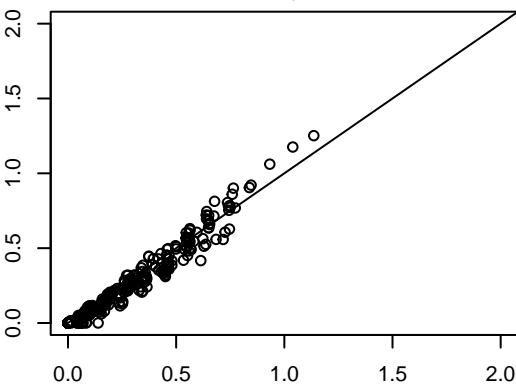

**CA.var+ti.con\_high, RMSE=0.13**

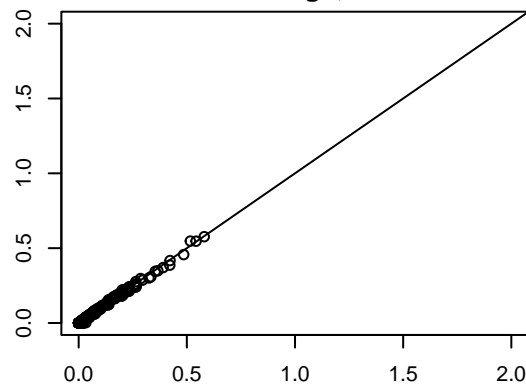

**CA.var\_1.25+ti.con, RMSE=0.29**

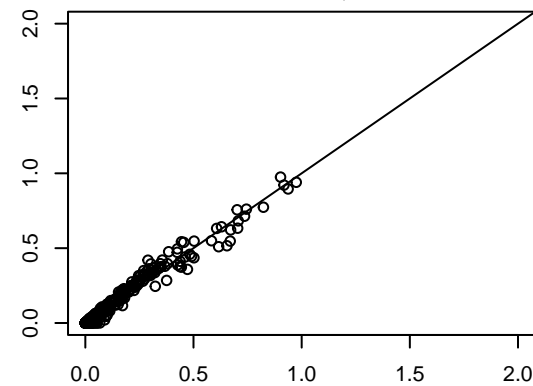

**CA.var+ti.con, RMSE=0.65**

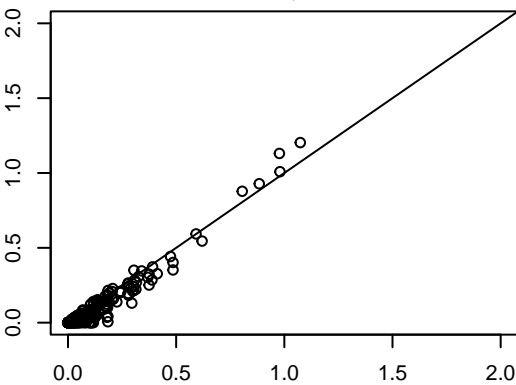

**CA.var+ti.var\_low, RMSE=0.23**

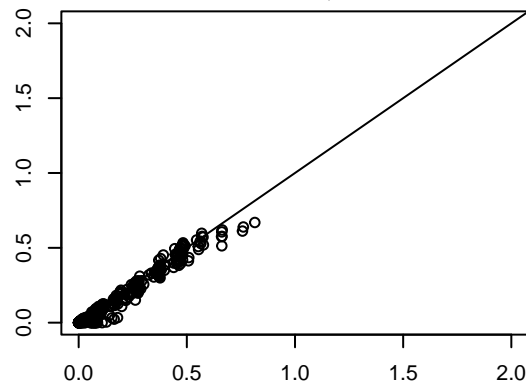

**CA.var\_1.25+ti.con\_low, RMSE=0.38**

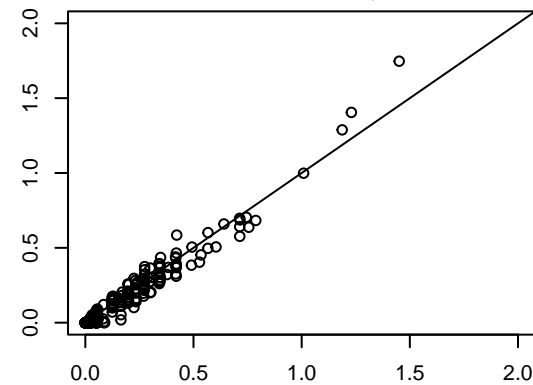

**CA.var\_1.25+ti.con, RMSE=0.3**

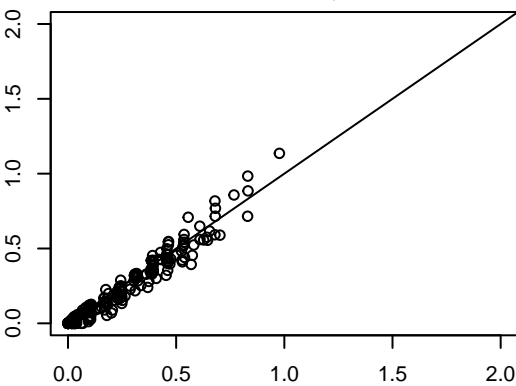

**CA.var+ti.con, RMSE=0.38**

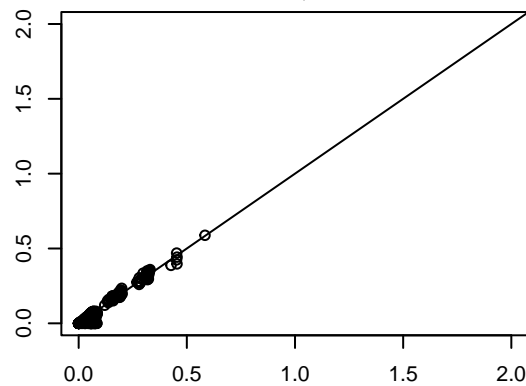

**CA.var+ti.var\_high, RMSE=0.22**

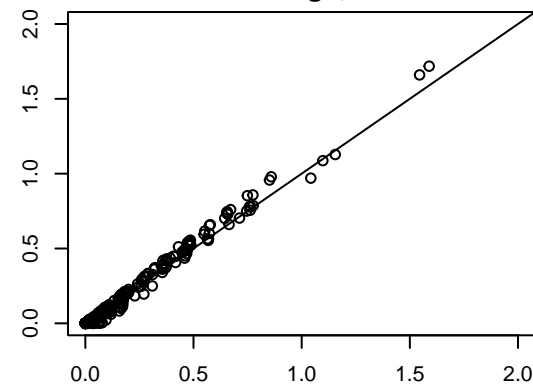

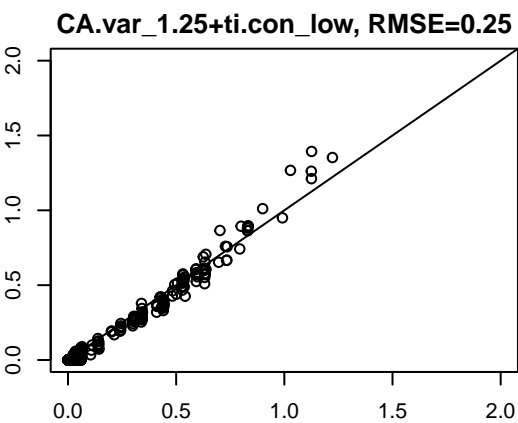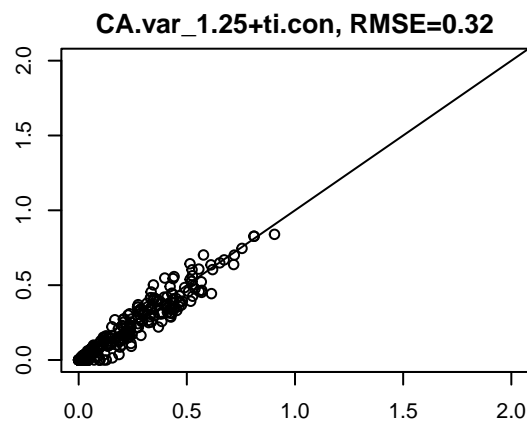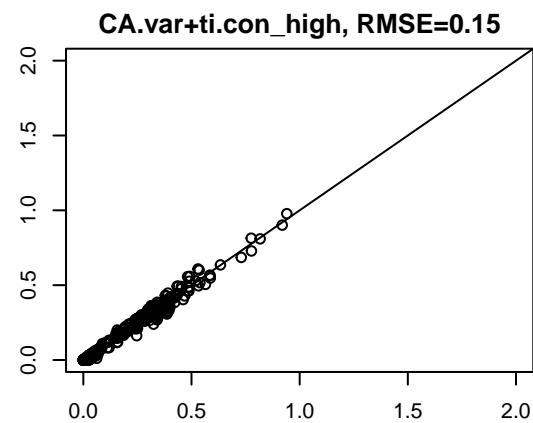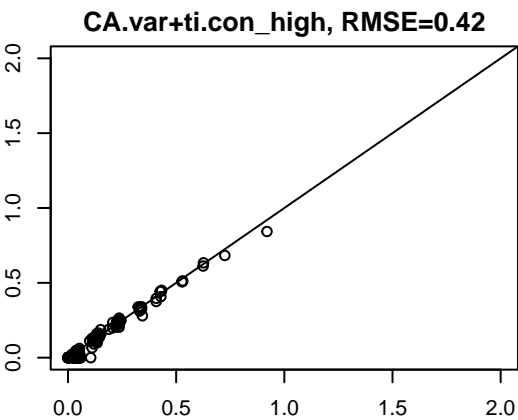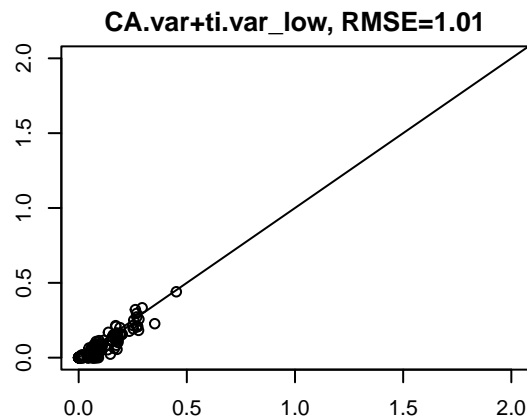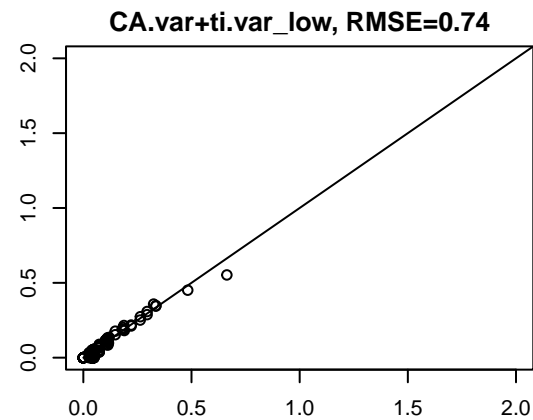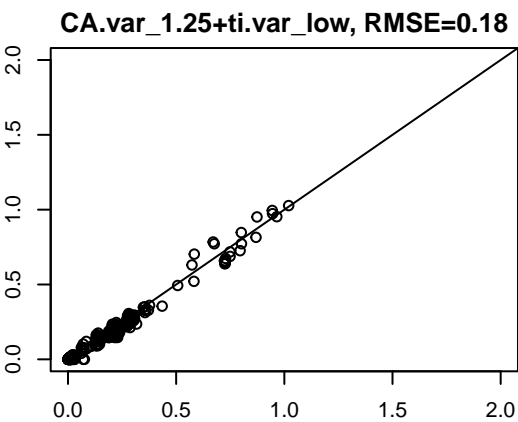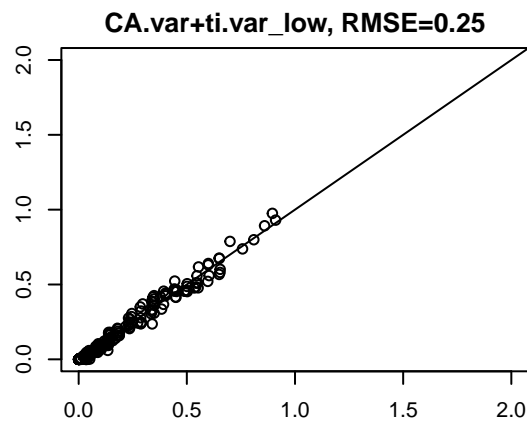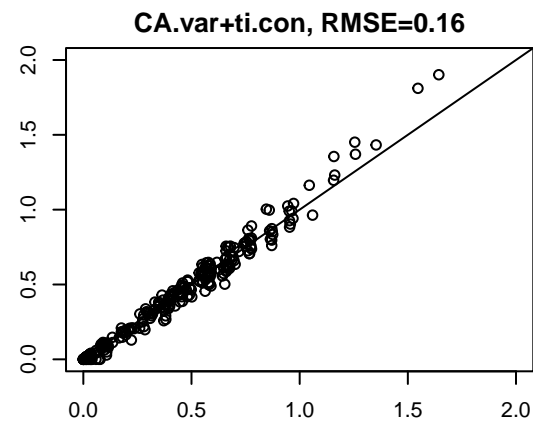

**CA.var+ti.con\_high, RMSE=0.18**

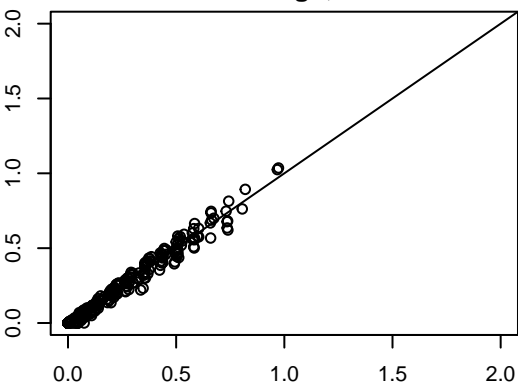

**CA.var\_1.25+ti.con\_low, RMSE=0.22**

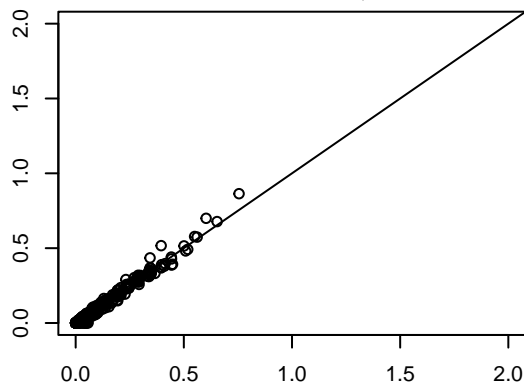

**CA.var\_1.25+ti.con\_high, RMSE=0.14**

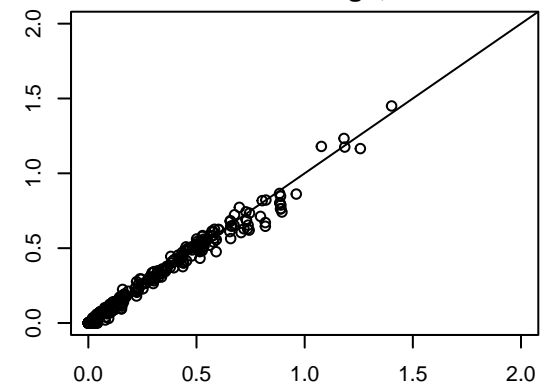

**CA.var\_1.25+ti.con, RMSE=0.24**

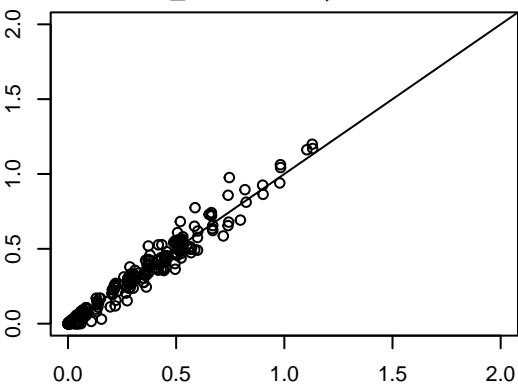

**CA.var\_1.25+ti.var\_low, RMSE=0.45**

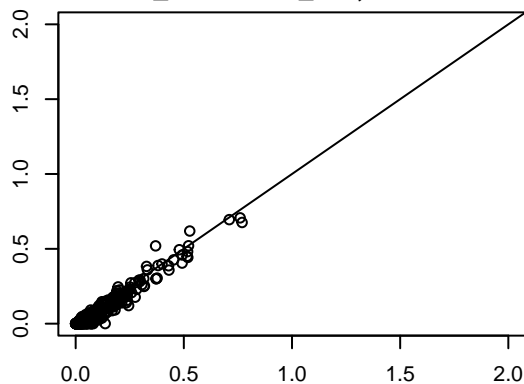

**CA.var\_1.25+ti.var\_low, RMSE=0.13**

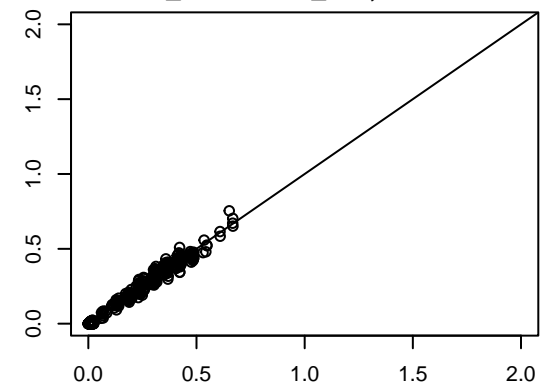

**CA.con\_.5+ti.con\_high, RMSE=1.22**

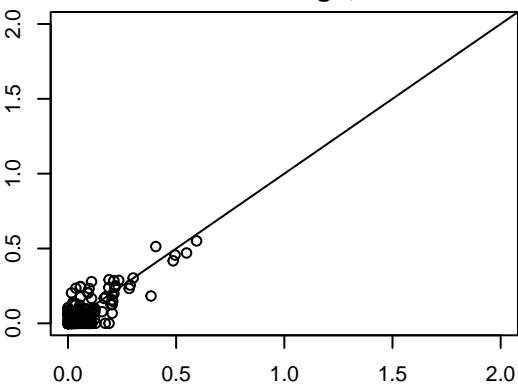

**CA.var+ti.con\_high, RMSE=0.1**

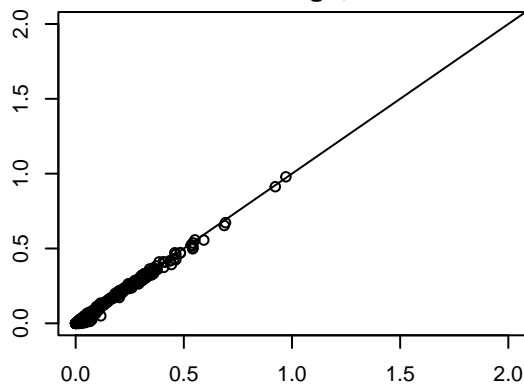

**CA.var\_1.5+ti.con\_low, RMSE=0.36**

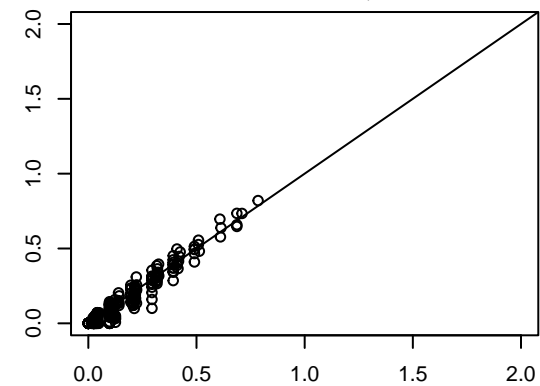

**CA.var+ti.con, RMSE=0.29**

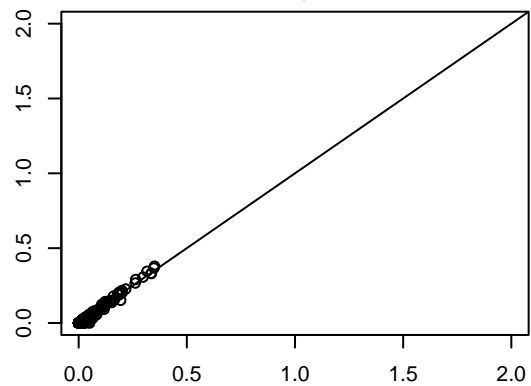

**CA.var+ti.var\_low, RMSE=0.37**

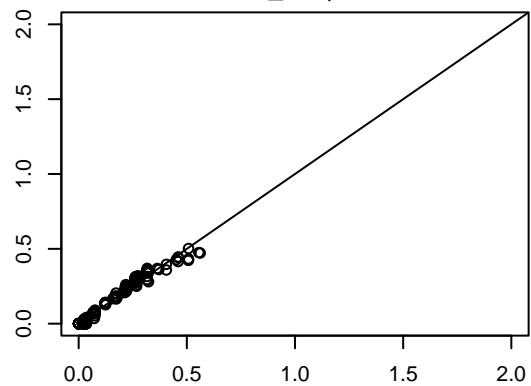

Supplement: s1 [file s1]
