# Supplementary material for: Radiators Adjustment in Multi-Family Residential Buildings—An Analysis Based on Data from Heat Meters
Source: MDPI journal article supplement (doi:10.3390/en16227485), 2023-11-08
Supplement: s1 [file s1]

Archive with 2 entries (2 files):
- Supplementary Material S1.pdf
- Supplementary Material S2.pdf
